# Supplementary material for: ‘Double redox-activity’ in azobenzene-quinonoid palladium(ii) complexes: a combined structural, electrochemical and spectroscopic study
Source: Royal Society of Chemistry journal article supplement (doi:10.1039/c0dt00944j), 2010-11-27

## Electronic Supplementary Information (ESI):

### 'Double Redox-Activity' in Azobenzene-Quinonoid Palladium(II) Complexes: A Combined Structural, Electrochemical and Spectroscopic Study

Naina Deibel,<sup>a</sup> David Schweinfurth,<sup>a</sup> Ralph Huebner,<sup>a</sup> Pierre Braunstein,<sup>\*b</sup> and Biprajit Sarkar<sup>\*a</sup>

<sup>a</sup> Institut für Anorganische Chemie, Universität Stuttgart, Pfaffenwaldring 55, D-70550, Stuttgart, Germany. E-mail: [sarkar@iac.uni-stuttgart.de](mailto:sarkar@iac.uni-stuttgart.de)

<sup>b</sup> Laboratoire de Chimie de Coordination, Institut de Chimie (UMR 7177 CNRS), Université de Strasbourg, 4 rue Blaise Pascal, F-67081, Strasbourg Cedex, France. E-mail : [braunstein@unistra.fr](mailto:braunstein@unistra.fr); Fax : (+)33368851322; Tel : (+)33368851308

Figure Captions:

**Figure S1:** Cyclic voltammogram of **1** in CH<sub>2</sub>Cl<sub>2</sub> / 0.1 M Bu<sub>4</sub>NPF<sub>6</sub> at 295 K. Scan rate 100 mV / s. The Fc<sup>0</sup> / Fc<sup>+</sup> couple was used as an internal standard.

**Figure S2:** Changes in the UV-vis-NIR spectrum of **2** during the reduction processes. From OTTLE spectroelectrochemistry in CH<sub>2</sub>Cl<sub>2</sub> / 0.1 M Bu<sub>4</sub>NPF<sub>6</sub>.

**Figure S3:** EPR spectrum of in-situ generated **2**<sup>•-</sup> in CH<sub>2</sub>Cl<sub>2</sub> / 0.1 M Bu<sub>4</sub>NPF<sub>6</sub> at 295 K together with simulation.

Figure S1:

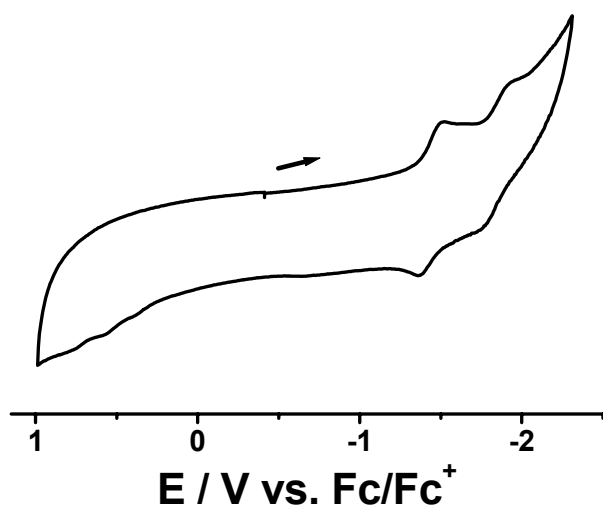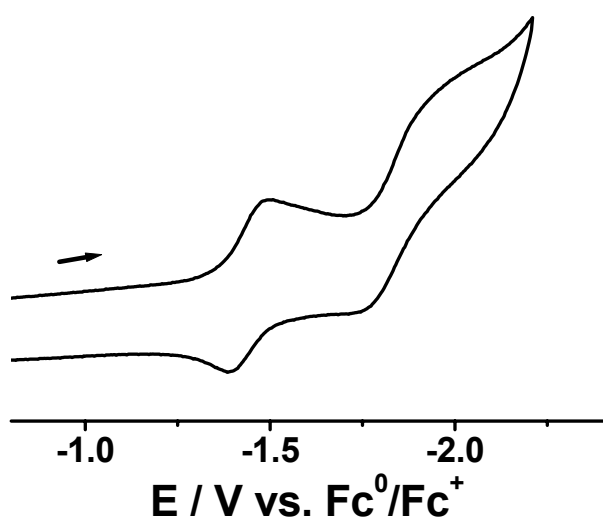

Figure S2:

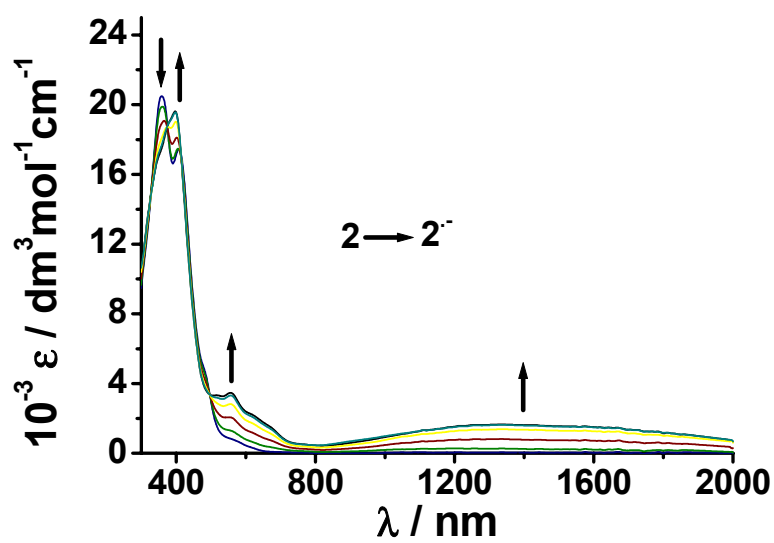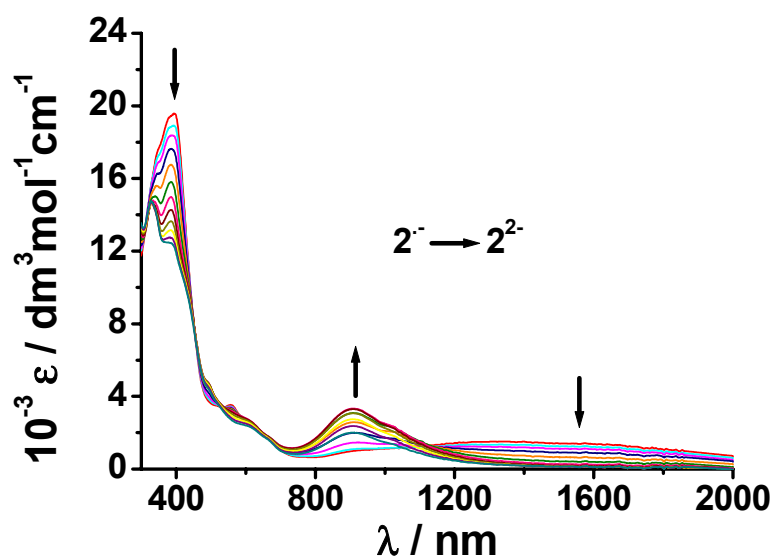

**Figure S3:**

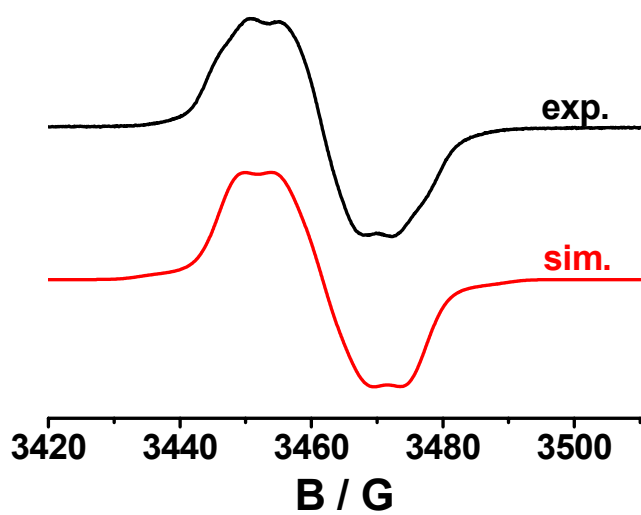

Supplement: c0dt00944j.pdf [file c0dt00944j.pdf]
